# Supplementary material for: Climate Changes, Natural Resources Depletion, COVID-19 Pandemic, and Russian-Ukrainian War: What Is the Impact on Habits Change and Mental Health?
Source: MDPI journal article supplement (doi:10.3390/ijerph191911929), 2022-09-21
Supplement: s1 [file s1]

## Supplementary Materials

**Table S1.** Differences in Covid-19, Natural Resource Depletion, Russian-Ukrainian War, and Climate Change preoccupation among age groups controlling for gender

|                                                         |              | Mean<br>Adjusted | Std.<br>Deviation | F       | df | Sign. |
|---------------------------------------------------------|--------------|------------------|-------------------|---------|----|-------|
| <b>Covid-19<br/>Preoccupation</b>                       | Young Adults | 3.04             | 0.051             | 19.133  | 3  | .000  |
|                                                         | Adults       | 2.76             | 0.051             |         |    |       |
|                                                         | Older Adults | 2.53             | 0.052             |         |    |       |
|                                                         | Elders       | 2.97             | 0.053             |         |    |       |
| <b>Natural Resource<br/>Depletion<br/>Preoccupation</b> | Young Adults | 3.92             | 0.057             | 198.911 | 3  | .000  |
|                                                         | Adults       | 2.83             | 0.057             |         |    |       |
|                                                         | Older Adults | 2.01             | 0.058             |         |    |       |
|                                                         | Elders       | 2.42             | 0.059             |         |    |       |
| <b>Russian-Ukrainian<br/>War Preoccupation</b>          | Young Adults | 4.07             | 0.041             | 5.462   | 3  | .001  |
|                                                         | Adults       | 3.98             | 0.041             |         |    |       |
|                                                         | Older Adults | 3.84             | 0.042             |         |    |       |
|                                                         | Elders       | 3.98             | 0.043             |         |    |       |
| <b>Climate Change<br/>Preoccupation</b>                 | Young Adults | 3.91             | 0.060             | 174.150 | 3  | .000  |
|                                                         | Adults       | 2.81             | 0.059             |         |    |       |
|                                                         | Older Adults | 2.08             | 0.060             |         |    |       |
|                                                         | Elders       | 2.44             | 0.061             |         |    |       |

**Table S2.** Differences in Covid-19, Natural Resource Depletion, Russian-Ukrainian War, and Climate Change habits among age groups controlling for gender

|                                                         |              | Mean<br>Adjusted | Std.<br>Deviation | F      | df | Sign. |
|---------------------------------------------------------|--------------|------------------|-------------------|--------|----|-------|
| <b>Covid Change<br/>Habits</b>                          | Young Adults | 3.98             | .059              | 65.766 | 3  | .000  |
|                                                         | Adults       | 3.39             | .058              |        |    |       |
|                                                         | Older Adults | 3.13             | .059              |        |    |       |
|                                                         | Elders       | 2.85             | .060              |        |    |       |
| <b>Natural Resource<br/>Depletion Change<br/>Habits</b> | Young Adults | 3.32             | .051              | 86.999 | 3  | .000  |
|                                                         | Adults       | 2.74             | .051              |        |    |       |
|                                                         | Older Adults | 2.18             | .052              |        |    |       |
|                                                         | Elders       | 2.49             | .053              |        |    |       |
| <b>Russian-Ukrainian<br/>War Change<br/>Habits</b>      | Young Adults | 2.21             | .041              | 29.768 | 3  | .000  |
|                                                         | Adults       | 2.47             | .040              |        |    |       |
|                                                         | Older Adults | 2.63             | .041              |        |    |       |
|                                                         | Elders       | 2.73             | .042              |        |    |       |
| <b>Climate Change<br/>Change Habits</b>                 | Young Adults | 3.07             | .048              | 76.265 | 3  | .000  |
|                                                         | Adults       | 2.54             | .047              |        |    |       |
|                                                         | Older Adults | 2.09             | .048              |        |    |       |
|                                                         | Elders       | 2.33             | .049              |        |    |       |

**Table S3.** Differences in Covid-19, Natural Resource Depletion, Russian-Ukrainian War, and Climate Change future habits among age groups controlling for gender

|                                                                |              | Mean<br>Adjusted | Std.<br>Deviation | F       | df | Sign. |
|----------------------------------------------------------------|--------------|------------------|-------------------|---------|----|-------|
| <b>Covid Change<br/>Future Habits</b>                          | Young Adults | 3.44             | .061              | 71.774  | 3  | .000  |
|                                                                | Adults       | 2.58             | .061              |         |    |       |
|                                                                | Older Adults | 2.28             | .062              |         |    |       |
|                                                                | Elders       | 2.39             | .063              |         |    |       |
| <b>Natural Resource<br/>Depletion Change<br/>Future Habits</b> | Young Adults | 4.24             | .060              | 235.976 | 3  | .000  |
|                                                                | Adults       | 2.91             | .060              |         |    |       |
|                                                                | Older Adults | 2.07             | .060              |         |    |       |
|                                                                | Elders       | 2.55             | .062              |         |    |       |
| <b>Russian-Ukrainian<br/>War Change<br/>Future Habits</b>      | Young Adults | 3.59             | .048              | 9.829   | 3  | .000  |
|                                                                | Adults       | 3.32             | .047              |         |    |       |
|                                                                | Older Adults | 3.25             | .048              |         |    |       |
|                                                                | Elders       | 3.32             | .049              |         |    |       |
| <b>Climate Change<br/>Change Future<br/>Habits</b>             | Young Adults | 4.09             | .058              | 228.468 | 3  | .000  |
|                                                                | Adults       | 2.84             | .058              |         |    |       |
|                                                                | Older Adults | 2.00             | .059              |         |    |       |
|                                                                | Elders       | 2.49             | .060              |         |    |       |

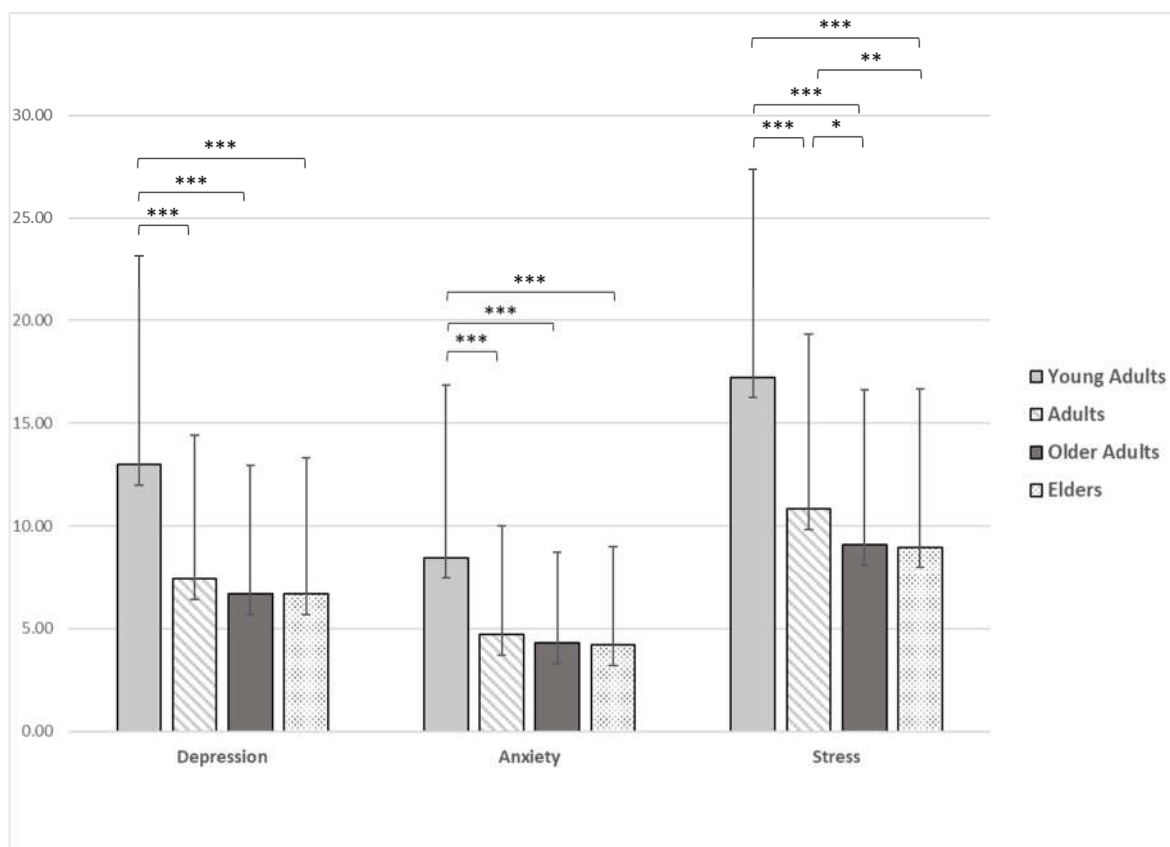

**Figure S1.** Differences in DASS-21 dimensions among age groups.

**Note.** \* =  $p < .05$ , \*\*\* =  $p < .001$

**Table S4.** Differences in DASS-21 dimensions among age groups controlling for gender

|               |              | <b>Mean<br/>Adjusted</b> | <b>Std.<br/>Deviation</b> | <b>F</b> | <b>df</b> | <b>Sign.</b> |
|---------------|--------------|--------------------------|---------------------------|----------|-----------|--------------|
| <b>DASS_D</b> | Young Adults | 12.6                     | .355                      | 62.679   | 3         | .000         |
|               | Adults       | 7.42                     | .354                      |          |           |              |
|               | Older Adults | 6.95                     | .358                      |          |           |              |
|               | Elders       | 6.70                     | .365                      |          |           |              |
| <b>DASS_A</b> | Young Adults | 8.20                     | .274                      | 45.135   | 3         | .000         |
|               | Adults       | 4.71                     | .273                      |          |           |              |
|               | Older Adults | 4.55                     | .276                      |          |           |              |
|               | Elders       | 4.24                     | .282                      |          |           |              |
| <b>DASS_S</b> | Young Adults | 16.79                    | .390                      | 82.311   | 3         | .000         |
|               | Adults       | 10.84                    | .389                      |          |           |              |
|               | Older Adults | 9.51                     | .394                      |          |           |              |
|               | Elders       | 9.06                     | .401                      |          |           |              |
